# Supplementary material
Source: publisher figshare collection journal article supplement (https://tandf.figshare.com/articles/dataset/_/12130860)

# Hydrothermal areas, microbial mats and sea grass in Paleochori Bay, Milos, Greece

Anant Khimasia<sup>a</sup>, Alessio Rovere<sup>b</sup> and Thomas Pichler<sup>a</sup>

<sup>a</sup> Department of Geosciences, University of Bremen, 28359 Bremen, Germany

<sup>b</sup> Zentrum für Marine Umweltwissenschaften(MARUM), University of Bremen, 28359 Bremen,Germany

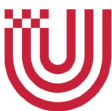

## Seabed classification

- 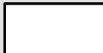 Bacterial mats
-  Former bacterial mats
-  Sea grass

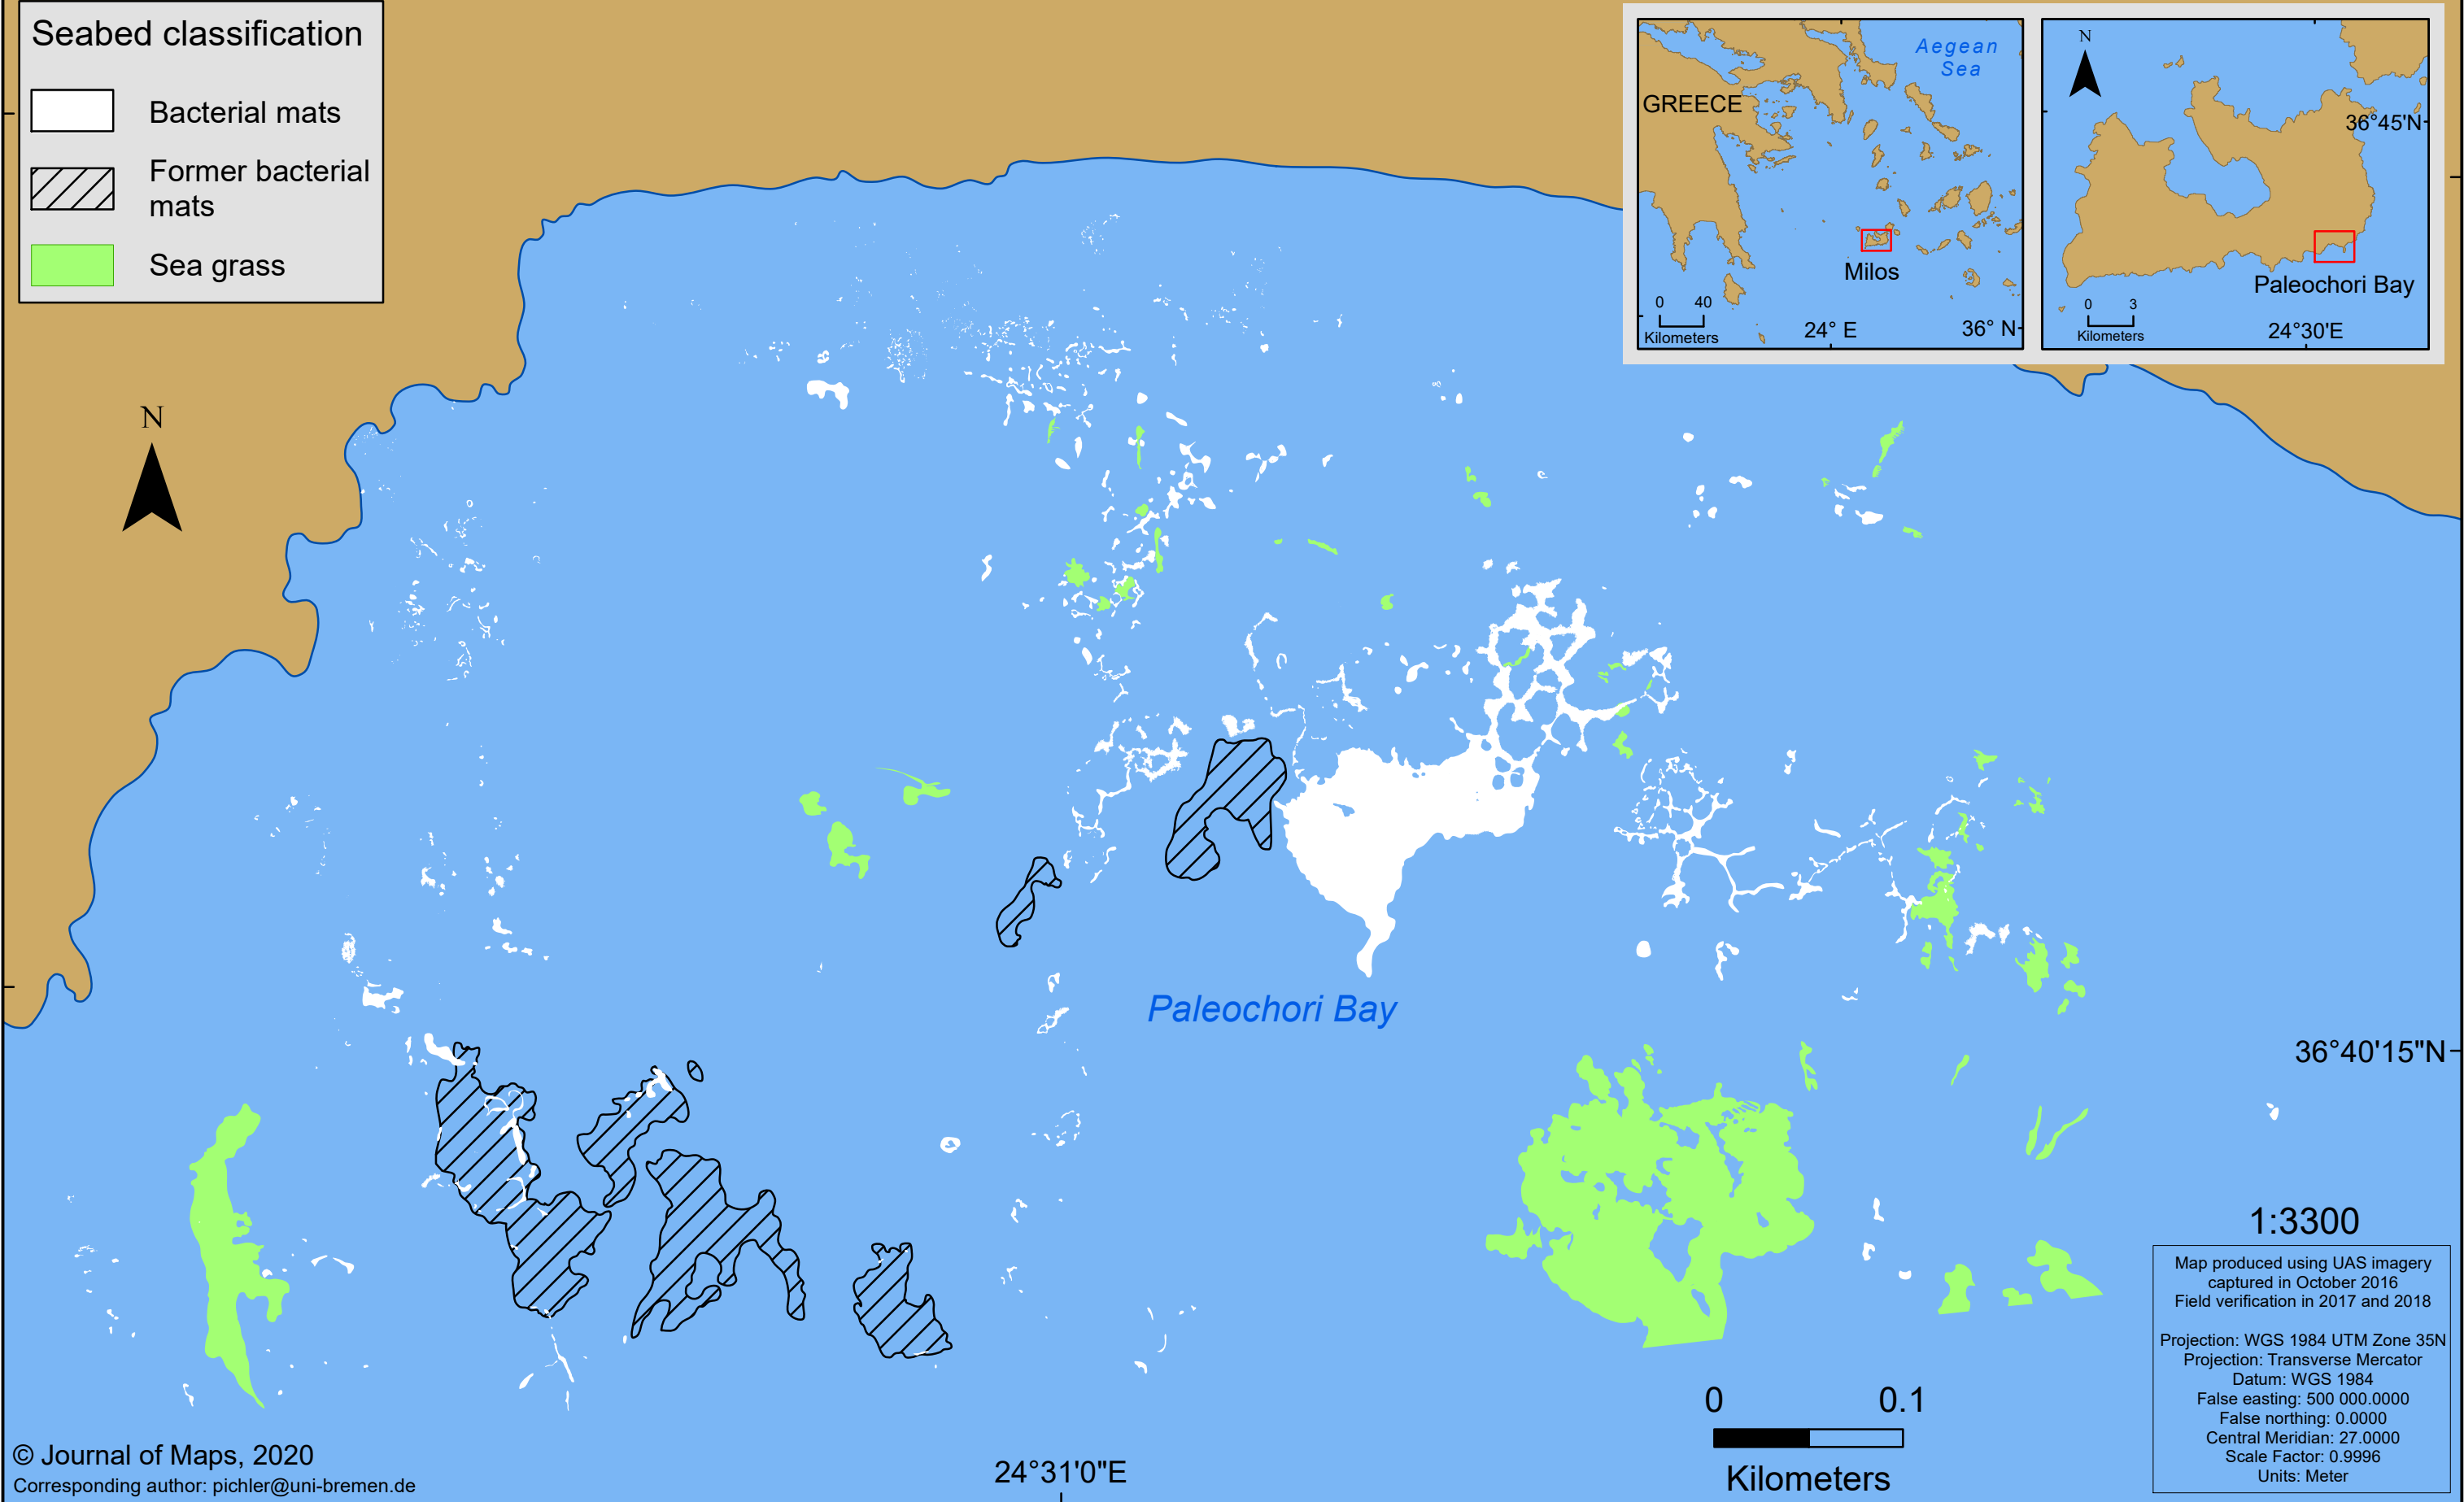

Supplement: Supplementary file 1 [file 3]
